# Supplementary material for: Soil phosphorus dynamics on terrestrial natural ecosystems
Source: Copernicus journal article supplement (doi:10.5194/bg-2017-307), 2017-08-14
Supplement: Supplementary file 1 [file bg-2017-307-supplement.zip]

## **Appendices – Supplementary files**

**Appendix S1 – Dataset:** The dataset is attached as a supplementary Excel file.

5

10

15

20

25

30

## Appendix S2 – Soil depth effect on soil P composition

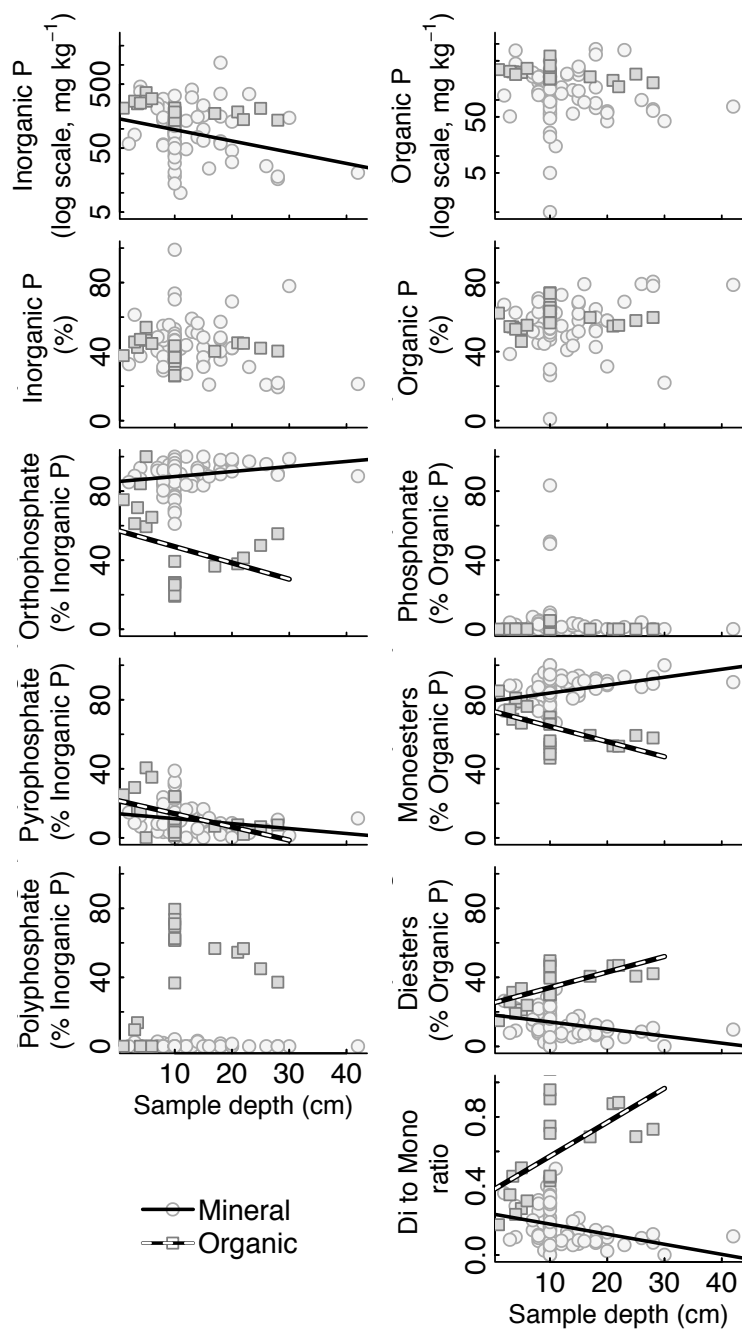

Figure 2. Relationship between edaphic properties and soil inorganic phosphorus (P) composition from soil mineral and organic layers on terrestrial natural ecosystems (n = 80 mineral layer and n = 20 organic layer).

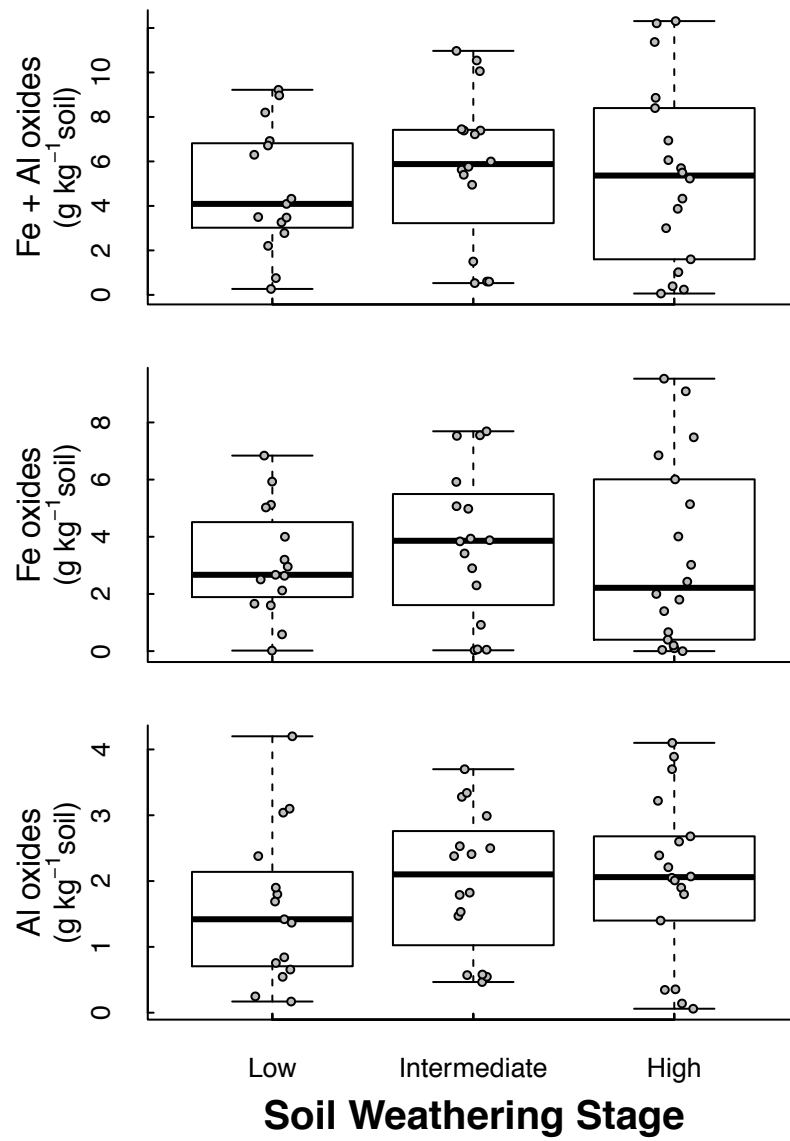

5 Figure S3. Soil weathering stage relationship with soil poorly crystalline Al and Fe ( $n = 49$ ) on terrestrial natural ecosystems. For all three panels  $p > 0.1$ .

**Appendix S4 – Models tested to explore the interdependences between edaphic and climatic variables (path analysis)**

We expected some directionalities in the relationships, based on the literature (Figures S4.1 and S4.3).

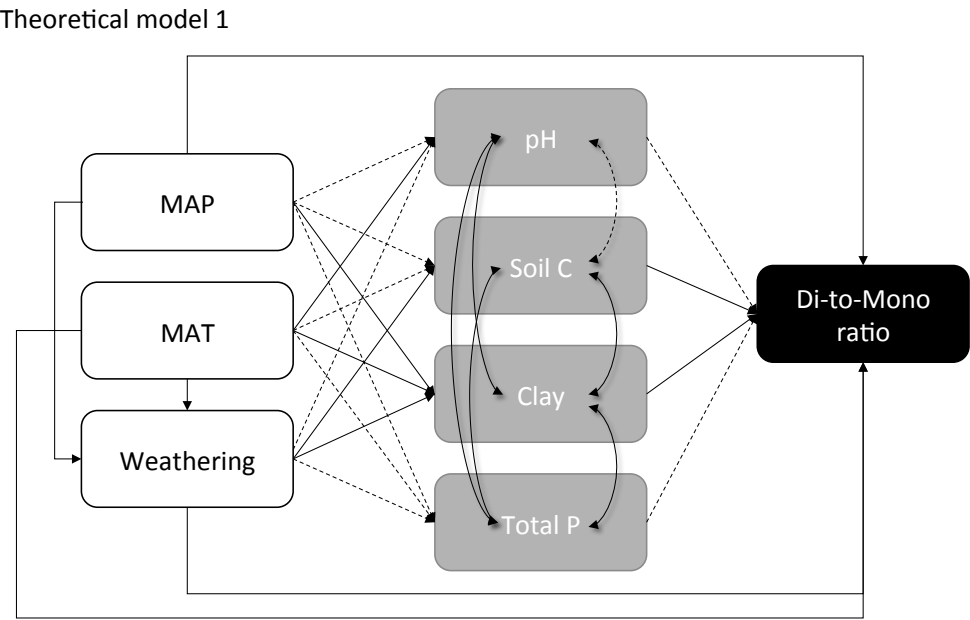

5 **Figure S4.1 Theoretical model 1 set to explore the interdependences between edaphic and climatic variables (path analysis).**

Final model 1

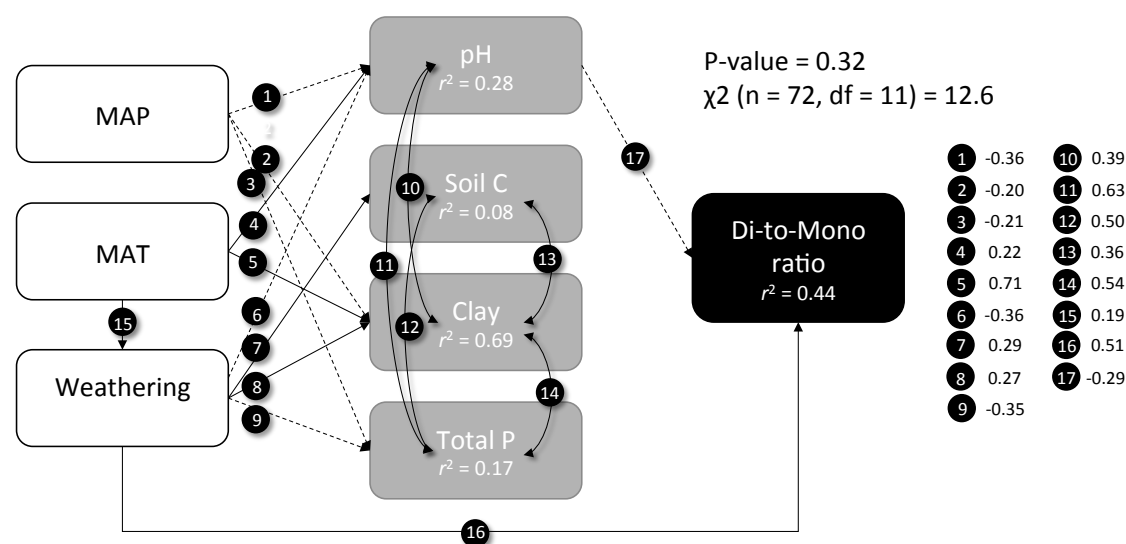

Figure S4.2 Final model 1 set to explore the interdependences between edaphic and climatic variables (path analysis).

5

10

15

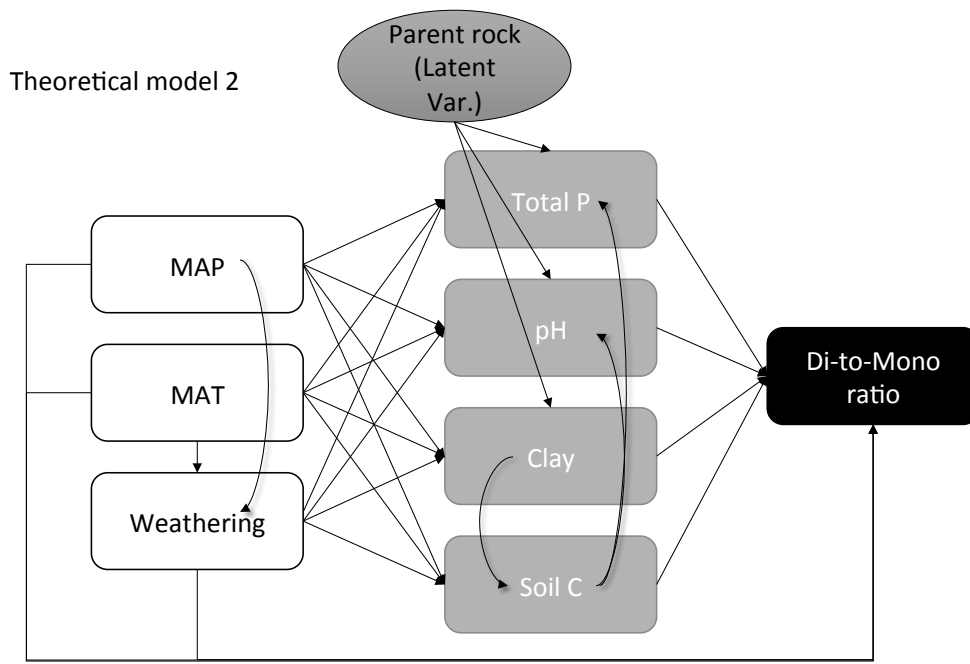

**Figure S4.3 Theoretical model 2 set to explore the interdependences between edaphic and climatic variables (path analysis).**

5

10

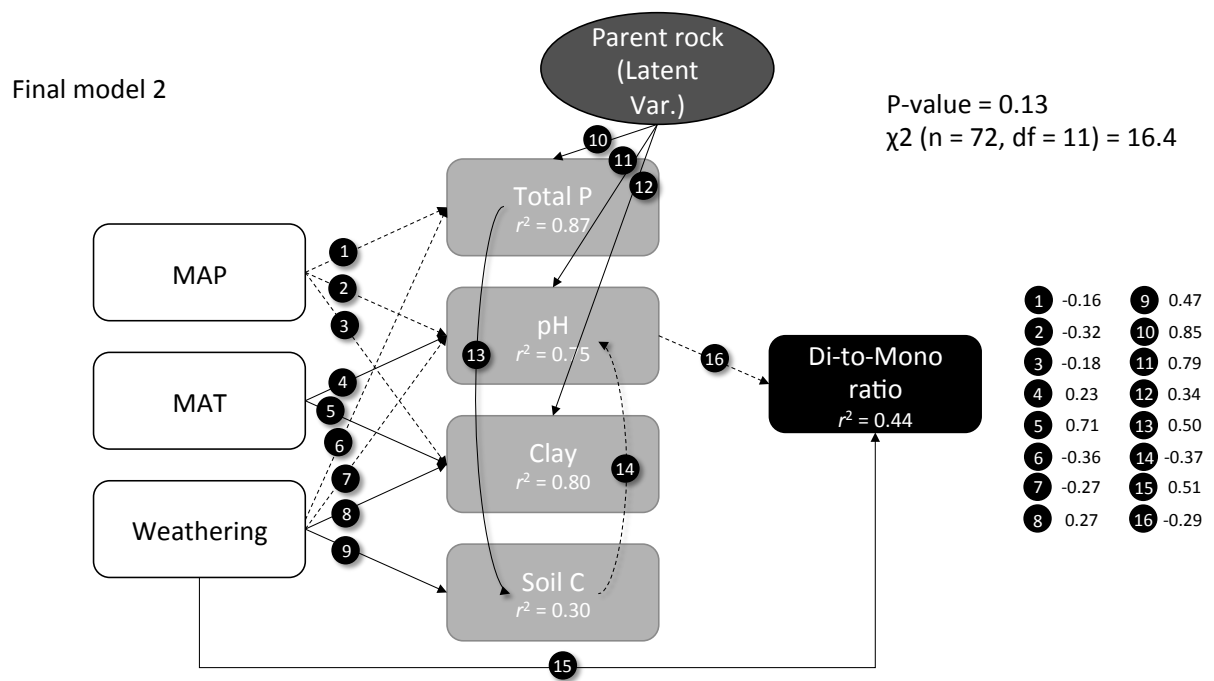

Figure S4.4 Final model 2 set to explore the interdependences between edaphic and climatic variables (path analysis).

5

10

15

```
> anova(fit.path1,fit.path2)
```

```
Chi Square Difference Test
```

|           | Df | AIC    | BIC    | Chisq  | Chisq diff | Df diff | Pr(>Chisq)  |
|-----------|----|--------|--------|--------|------------|---------|-------------|
| fit.path1 | 11 | 627.25 | 681.89 | 12.677 |            |         |             |
| fit.path2 | 11 | 626.99 | 677.08 | 16.414 | 3.7376     | 0       | < 2.2e-16 * |

\*\*

Final model 2 seems the most appropriate

**Figure S4.5 Comparison between final models 1 and 2 that were set to explore the interdependences between edaphic and climatic variables (path analysis).**
