# Supplementary material for: Soil phosphorus dynamics on terrestrial natural ecosystems
Source: Copernicus journal article supplement (doi:10.5194/bg-2017-307), 2017-08-14
Supplement: Supplementary file 1 [file DATASET.xlsx]

## Sheet: Legend
Variable	Description	Unit
ID	Identification number	-
Reference	Reference	-
land_use	Land use	-
Country	Country	-
Locate	Locate specification	-
Horizon	Soil horizont	-
Latitude	Latitude	-
Longitude	Longitude	-
Elevation	Elevation above sea level	m
Soil_type	Soil type	-
Parent_Material	Parent rock material	-
Precipitation_mm	Mean annual precipitation	mm year-1
Temperature_C	Mean annual temperature	°C
MI	Moisture index (MIF = PPTmean / PETF)	mm mm-1
clay	Clay content	%wt
silt	Silt content	%wt
sand	Sand content	%wt
sample_depth_cm	Soil sampling depth	cm
pH_H2O	Soil pH measured in H2O solution	0-14
P_retention_potential	Class of soil phosphorus retention	Low, Moderate, High, Very High
Soil_weathering	Class of soil weathering	Low, Intermediate, High
total_carbon_gkg	Total carbon content	g C kg-1 soil
total_nitrogen_gkg	Total nitrogen content	g N kg-1 soil
total_phosphorus_mgkg	Total phosphorus content	mg P kg-1 soil
CP_ratio	CP ratio	-
naohedta_p_mgkg	Total phosphorus extracted with NaOH EDTA	mg P kg-1 soil
_perc_naohedta_totalp	The percentage of P extracted with NaOH EDTA from total P	%
organic_p_naohedta_mgkg	Total organic phosphorus in NaOH EDTA extracts	mg P kg-1 soil
inorganic_p_naohedta_mgkg	Total inorganic phosphorus in NaOH EDTA extracts	mg P kg-1 soil
monoesters_mgkg	Monoesters in NaOH EDTA extracts	mg P kg-1 soil
diesters_mgkg	Diesters in NaOH EDTA extracts	mg P kg-1 soil
phosphonate_mgkg	Phosphonate in NaOH EDTA extracts	mg P kg-1 soil
phosphate_mgkg	Orthophosphate in NaOH EDTA extracts	mg P kg-1 soil
pyrophosphate_mgkg	Pyrophosphate in NaOH EDTA extracts	mg P kg-1 soil
polyphosphate_mgkg	Polyphosphate in NaOH EDTA extracts	mg P kg-1 soil
other_p_species_mgkg	Other P species in NaOH EDTA extracts	mg P kg-1 soil
organic_p_naohedta_perc_	Organic phosphorus in NaOH EDTA extracts	% of total NaOH EDTA P
inorganic_p_naohedta_perc_	Inorganic phosphorus in NaOH EDTA extracts	% of total NaOH EDTA P
phosphonate_perc_organic	Phosphonate-to-organic P ratio	% of NaOH EDTA organic P
monoesters_perc_organic	Monoesters-to-organic P ratio	% of NaOH EDTA organic P
diesters_perc_organic	Diesters-to-organic P ratio	% of NaOH EDTA organic P
Di_to_Mono_ratio	Diester-to-monoester ratio	-
phosphate_perc_inorganic	Orthophosphate-to-inorganic P ratio	% of NaOH EDTA inorganic P
pyro_perc_inorganic	Pyrophosphate-to-inorganic P ratio	% of NaOH EDTA inorganic P
poly_perc_inorganic	Polyphosphate-to-inorganic P ratio	% of NaOH EDTA inorganic P

## Sheet: References
Abbreviation	Number of plots used	Reference
Backnas et al. 2012	1	Backnäs, S., Laine-Kaulio, H., Kløve, B., 2012. Phosphorus forms and related soil chemistry in preferential flowpaths and the soil matrix of a forested podzolic till soil profile. Geoderma 189-190, 50–64.
Celi et al. 2013	4	Celi, L., Cerli, C., Turner, B.L., Santoni, S., Bonifacio, E., 2013. Biogeochemical cycling of soil phosphorus during natural revegetation of Pinus sylvestris on disused sand quarries in Northwestern Russia. Plant Soil 367, 121–134.
Doolette et al. 2016	5	Doolette, A.L., Smernik, R.J., McLaren, T.I., 2016. The composition of organic phosphorus in soils of the Snowy Mountains region of south-eastern Australia. Soil Research 10, 10.1071/SR16058.
Li et al. 2016	1	Li, M., Mazzei, P., Cozzolino, V., Monda, H., Hu, Z., Piccolo, A., 2015. Optimized procedure for the determination of P species in soil by liquid-state 31P-NMR spectroscopy. Chemical and Biological Technologies in Agriculture, doi: 10.1186/s40538-014-0027-8.
McDowell and Steward 2006	4	McDowell, R.W., Stewart, I., 2006. The phosphorus composition of contrasting soils in pastoral, native and forest management in Otago, New Zealand: Sequential extraction and 31P NMR. Geoderma 130, 176–189.
McDowell et al. 2007	26	McDowell, R.W., Cade-Menun, B., Stewart, I., 2007. Organic phosphorus speciation and pedogenesis: Analysis by solution 31P nuclear magnetic resonance spectroscopy. Eur. J. Soil Sci. 58, 1348–1357.
Turner 2008	1	Turner, B.L., 2008. Soil organic phosphorus in tropical forests: An assessment of the NaOH-EDTA extraction procedure for quantitative analysis by solution 31P NMR spectroscopy. Eur. J. Soil Sci. 59, 453–466.
Turner and Engelbrecht 2011	19	Turner, B.L., Engelbrecht, B.M.J., 2011. Soil organic phosphorus in lowland tropical rain forests. Biogeochemistry 103, 297–315.
Turner et al. 2003	1	Turner, B.L., Cade-Menun, B.J., Westermann, D.T., 2003. Organic Phosphorus Composition and Potential Bioavailability in Semi-Arid Arable Soils of the Western United States. Soil Sci. Soc. Am. J. 67, 1168.
Turner et al. 2007	9	Turner, B.L., Condron, L.M., Richardson, S.J., Peltzer, D. a., Allison, V.J., 2007. Soil organic phosphorus transformations during pedogenesis. Ecosystems 10, 1166–1181.
Turner et al. 2014	20	Turner, B.L., Wells, A., Condron, L.M., 2014. Soil organic phosphorus transformations along a coastal dune chronosequence under New Zealand temperate rain forest. Biogeochemistry 121, 595–611.
Vicent et al. 2010	1	Vincent, A.G., Turner, B.L., Tanner, E.V.J., 2010. Soil organic phosphorus dynamics following perturbation of litter cycling in a tropical moist forest. Eur. J. Soil Sci. 61, 48–57.
Vicent et al. 2013	8	Vincent, A.G., Vestergren, J., Gröbner, G., Persson, P., Schleucher, J., Giesler, R., 2013. Soil organic phosphorus transformations in a boreal forest chronosequence. Plant Soil 367, 149–162.

## Sheet: DATASET
ID	Reference	land_use	Country	Locate	Horizon	Latitude	Longitude	Elevation	Soil_type	Parent_Material	Precipitation_mm	Temperature_C	MI	clay	silt	sand	sample_depth_cm	pH_H2O	P_retention_potential	Soil_weathering	total_carbon_gkg	total_nitrogen_gkg	total_phosphorus_mgkg	CP_ratio	naohedta_p_mgkg	_perc_naohedta_totalp	organic_p_naohedta_mgkg	inorganic_p_naohedta_mgkg	monoesters_mgkg	diesters_mgkg	phosphonate_mgkg	phosphate_mgkg	pyrophosphate_mgkg	polyphosphate_mgkg	other_p_species_mgkg	organic_p_naohedta_perc_	inorganic_p_naohedta_perc_	phosphonate_perc_organic	monoesters_perc_organic	diesters_perc_organic	Di_to_Mono_ratio	phosphate_perc_inorganic	pyro_perc_inorganic	poly_perc_inorganic
1	Backnas et al. 2012	Native vegetation	Finland	x	A-E	65.8908	25.7789	114	Haplic podzol (FAO)	strongly eroded Archaean granitoid bedrock, consisting of gneiss complexes such as tonalite, trondhjemite, migmatite and paragneiss, aged about 2800 Ma	575	2	1.20887	3	24	73	20	3.9	Moderate	High	235		110.8		108.5	97.9242	62.93	45.57	57.1795	5.7505	0	44.268	1.302	0	0	0.58	0.42	0.001	0.908621	0.0913793	0.100569	0.971429	0.0285714	0.001
2	Celi et al. 2013	Native vegetation	Russia	Korovsky district_ Russia_ close to the village of Staraya Maluxa_40_O	O	59.8667	30.9833	25	Entisol - Typic Cryopsamment (USDA, Cambic arenosol in FAO class.)	quaternary fluvio-glacial sands (<10,000 yearB.P.) sands of the Quaternary period The average chemical composition of the spoil material in different areas is: SiO2 89.0±0.08 %, Fe2O3 1.67±0.17 %, Al2O3 4.32± 0.25 %, CaO 0.28±0.02 %, MgO 0.23±0.01 %, Na2O 1.30±0.06 %, and K2O 1.80±0.17 % (n=4) (Simonov G., unpublished data).	563	4.2	0.886045				3.5	5.2			238	8.67	720.5	330.326	582	80.7772	317	247	217	99	0	174	39	34	19	0.542955	0.424399	0.001	0.686709	0.313291	0.456221	0.704453	0.157895	0.137652
3	Celi et al. 2013	Native vegetation	Russia	Korovsky district_ Russia_ close to the village of Staraya Maluxa_undisturbed_O	O	59.8667	30.9833	25	Spodosol (Typic Haplocryod, USDA) (Dystric cambisol)	quaternary fluvio-glacial sands (<10,000 yearB.P.) sands of the Quaternary period The average chemical composition of the spoil material in different areas is: SiO2 89.0±0.08 %, Fe2O3 1.67±0.17 %, Al2O3 4.32± 0.25 %, CaO 0.28±0.02 %, MgO 0.23±0.01 %, Na2O 1.30±0.06 %, and K2O 1.80±0.17 % (n=4) (Simonov G., unpublished data).	563	4.2	0.886045				5	4.4			452	11.96	891.9	506.783	682	76.466	313	369	208	105	0	369	0	0	0	0.458944	0.541056	0.001	0.664537	0.335463	0.504808	1	0.001	0.001
4	Celi et al. 2013	Native vegetation	Russia	Korovsky district_ Russia_ close to the village of Staraya Maluxa_40_A	A	59.8667	30.9833	25	Entisol - Typic Cryopsamment (USDA, Cambic arenosol in FAO class.)	quaternary fluvio-glacial sands (<10,000 yearB.P.) sands of the Quaternary period The average chemical composition of the spoil material in different areas is: SiO2 89.0±0.08 %, Fe2O3 1.67±0.17 %, Al2O3 4.32± 0.25 %, CaO 0.28±0.02 %, MgO 0.23±0.01 %, Na2O 1.30±0.06 %, and K2O 1.80±0.17 % (n=4) (Simonov G., unpublished data).	563	4.2	0.886045	6.6	11.4	82	9.5	4.7	Moderate	Intermediate	36.4	1.53	327.5	111.145	183	55.8779	126	57	90	36	0	50	7	0	0	0.688525	0.311475	0.001	0.714286	0.285714	0.4	0.877193	0.122807	0.001
5	Celi et al. 2013	Native vegetation	Russia	Korovsky district_ Russia_ close to the village of Staraya Maluxa_undisturbed_E	E	59.8667	30.9833	25	Spodosol (Typic Haplocryod) (USDA)	quaternary fluvio-glacial sands (<10,000 yearB.P.) sands of the Quaternary period The average chemical composition of the spoil material in different areas is: SiO2 89.0±0.08 %, Fe2O3 1.67±0.17 %, Al2O3 4.32± 0.25 %, CaO 0.28±0.02 %, MgO 0.23±0.01 %, Na2O 1.30±0.06 %, and K2O 1.80±0.17 % (n=4) (Simonov G., unpublished data).	563	4.2	0.886045	5.2	9.4	89.3	11	4.2	Moderate	High	2.87	0.12	31.79	90.28	24	75.4954	15	10	10	5	0	9	1	0	0	0.625	0.416667	0.001	0.666667	0.333333	0.5	0.9	0.1	0.001
6	McDowell and Steward 2006	Native vegetation	New Zealand	Soils were sampled within a 50 km radius of the city of Dunedin_ Otago_ New Zealand_Leith_Native	A	-45.858	170.536	300	Orthic Acrisol	a mixture of basalt and loess	1103	9.4	1.35538	12	50	38	15	5.3	High	Intermediate	103		953	108.08	488	51.2067	282	206	257	25	0	196	10	0	0	0.577869	0.422131	0.001	0.911348	0.0886525	0.0972763	0.951456	0.0485437	0.001
7	McDowell and Steward 2006	Native vegetation	New Zealand	Soils were sampled within a 50 km radius of the city of Dunedin_ Otago_ New Zealand_Brighton_Native	A	-45.858	170.536	200	Dystric Regosol	wind-blown sand and loess	808	10.4	1.00108	10	10	80	12	5.4	Moderate	Low	49		639	76.6823	306	47.8873	168	134	158	10	0	134	0	0	4	0.54902	0.437908	0.001	0.940476	0.0595238	0.0632911	1	0.001	0.001
8	McDowell and Steward 2006	Native vegetation	New Zealand	Soils were sampled within a 50 km radius of the city of Dunedin_ Otago_ New Zealand_Cargill_Native	A	-45.858	170.536	150	Humic Acrisol	basalt	956	9.3	1.18934	39	26	35	15	4.8	High	High	103		714	144.258	502	70.3081	340	162	280	60	0	147	15	0	0	0.677291	0.322709	0.001	0.823529	0.176471	0.214286	0.907407	0.0925926	0.001
9	McDowell and Steward 2006	Native vegetation	New Zealand	Soils were sampled within a 50 km radius of the city of Dunedin_ Otago_ New Zealand_Warepa_Native	A	-45.858	170.536	150	Gleyic Acrisol	loess	734	10.4	0.913153	20	50	30	15	6	Low	Low	56		829	67.5513	634	76.4777	393	233	369	24	0	209	24	0	8	0.619874	0.367508	0.001	0.938931	0.0610687	0.0650407	0.896996	0.103004	0.001
10	McDowell et al. 2007	Native vegetation	New Zealand	Basalt maturity sequence_Camphill	A	-45.1807	170.12	363	Mollisols Udolls	scoria, scoriaceous rock or basalt lava flows (Waipiata volcanic series)	450	9	0.538209	23	24	53	18	7	Low	Low	13.8	1.4	1060	13.0189	136	12.8302	72	64	65	6	1	59	5	0	0	0.529412	0.470588	0.0138889	0.902778	0.0833333	0.0923077	0.921875	0.078125	0.001
11	McDowell et al. 2007	Native vegetation	New Zealand	Basalt maturity sequence_Evans	A	-43.4377	172.624	7	Mollisols Udolls	scoria, scoriaceous rock or basalt lava flows	450	12.5	0.472353	18	23	59	8	5.4	Low	Low	45.2	4.1	1600	28.25	535	33.4375	241	294	221	18	2	284	10	0	0	0.450467	0.549533	0.00829876	0.917012	0.0746888	0.081448	0.965986	0.0340136	0.001
12	McDowell et al. 2007	Native vegetation	New Zealand	Basalt maturity sequence_Highcliff	A	-45.7729	170.546	98	Mollisols Udolls	scoria, scoriaceous rock or basalt lava flows (Waipiata volcanic series)	1000	8	1.25505	19	27	54	23	6	Low	Low	58.9	5.9	2530	23.2806	1128	44.585	777	351	725	42	10	341	10	0	0	0.68883	0.31117	0.01287	0.933076	0.0540541	0.057931	0.97151	0.02849	0.001
13	McDowell et al. 2007	Native vegetation	New Zealand	Basalt maturity sequence_Stewart	A				Mollisols Udolls	scoria, scoriaceous rock or basalt lava flows							18	5.6	Low	Low	75.4	7.4	3950	19.0886	1894	47.9494	809	1085	745	56	8	1057	28	0	0	0.427138	0.572862	0.00988875	0.92089	0.0692213	0.0751678	0.974194	0.0258065	0.001
14	McDowell et al. 2007	Native vegetation	New Zealand	Basalt maturity sequence_Dasher	A	-45.1341	170.468	930	Mollisols Udolls	scoria, scoriaceous rock or basalt lava flows	1000	6	1.17403	18	23	59	4	4.8	Moderate	Intermediate	128.6	8.5	2260	56.9027	1220	53.9823	763	457	673	70	20	427	30	0	0	0.62541	0.37459	0.0262123	0.882045	0.0917431	0.104012	0.934354	0.0656455	0.001
15	McDowell et al. 2007	Native vegetation	New Zealand	Basalt maturity sequence_Waireka	A	-45.141	170.89	43	Mollisols Udolls	scoria, scoriaceous rock or basalt lava flows	500	10.5	0.596269	25	22	53	18	6	Low	Intermediate	60.8	5.6	1880	32.3404	1001	53.2447	647	354	597	42	8	329	25	0	0	0.646354	0.353646	0.0123648	0.92272	0.064915	0.0703518	0.929379	0.0706215	0.001
16	McDowell et al. 2007	Native vegetation	New Zealand	Basalt maturity sequence_Miriwhakatiki	A	-45.7758	170.536	155	Mollisols Udolls	scoria, scoriaceous rock or basalt lava flows (Kerikeri volcanic series, basaltic scoria)	1000	8	1.24916	21	28	51	8	5.6	Low	Intermediate	72.4	5.7	970	74.6392	476	49.0722	269	207	232	23	14	180	27	0	0	0.565126	0.434874	0.0520446	0.862454	0.0855019	0.0991379	0.869565	0.130435	0.001
17	McDowell et al. 2007	Native vegetation	New Zealand	Basalt maturity sequence_Ohaeawai	A	-35.3388	173.89	68	Mollisols Udolls	scoria, scoriaceous rock or basalt lava flows	1650	14	1.49206	26	32	42	8	5.6	Moderate	Intermediate	95.9	7	1070	89.6262	355	33.1776	207	148	157	40	10	123	22	3	0	0.583099	0.416901	0.0483092	0.758454	0.193237	0.254777	0.831081	0.148649	0.0202703
18	McDowell et al. 2007	Native vegetation	New Zealand	Basalt maturity sequence_Papakauri	A	-35.3725	173.928	200	Mollisols Udolls	scoria, scoriaceous rock or basalt lava flows	1527	15	1.36755	30	31	39	8	5.5	High	Intermediate	71.5	5.5	880	81.25	455	51.7045	243	212	182	57	4	179	33	0	0	0.534066	0.465934	0.0164609	0.748971	0.234568	0.313187	0.84434	0.15566	0.001
19	McDowell et al. 2007	Native vegetation	New Zealand	Basalt maturity sequence_Maunu	A	-35.7437	174.283	94	Mollisols Udolls	scoria, scoriaceous rock or basalt lava flows	1300	14.5	1.18291	32	27	41	13	5.9	High	Intermediate	71.6	5.2	1990	35.9799	694	34.8744	284	410	250	34	0	350	60	0	0	0.409222	0.590778	0.001	0.880282	0.119718	0.136	0.853659	0.146341	0.001
20	McDowell et al. 2007	Native vegetation	New Zealand	Basalt maturity sequence_Kiripaka	A	-35.3415	173.969	73	Mollisols Udolls	scoria, scoriaceous rock or basalt lava flows	1500	15	1.35595	40	30	30	13	5.3	High	Intermediate	80.8	5.1	1620	49.8765	604	37.284	293	311	264	29	0	258	53	0	0	0.485099	0.514901	0.001	0.901024	0.0989761	0.109848	0.829582	0.170418	0.001
21	McDowell et al. 2007	Native vegetation	New Zealand	Basalt maturity sequence_Apotu	A	-35.6298	174.285	117	Mollisols Udolls	scoria, scoriaceous rock or basalt lava flows	1450	14	1.32056	30	30	40	4	5	High	Intermediate	250.8	14.7	1380	181.739	824	59.7101	443	381	345	98	0	332	49	0	0	0.537621	0.462379	0.001	0.778781	0.221219	0.284058	0.871391	0.128609	0.001
22	McDowell et al. 2007	Native vegetation	New Zealand	Basalt maturity sequence_Ruatangata	A	-35.6286	174.155	140	Ultisols - Humults	scoria, scoriaceous rock or basalt lava flows (Kerikeri volcanic series, basaltic flow)	1300	14	1.17891	65	21	14	8	5.7	High	High	104.2	5.8	560	186.071	277	49.4643	141	136	107	34	0	104	32	0	0	0.509025	0.490975	0.001	0.758865	0.241135	0.317757	0.764706	0.235294	0.001
23	McDowell et al. 2007	Native vegetation	New Zealand	Basalt maturity sequence_Atawhai	A	-41.2896	173.296	185	Ultisols - Humults	scoria, scoriaceous rock or basalt lava flows	1100	12	1.03035	30	27	43	18	5.9	High	High	25.5	1.6	440	57.9545	147	33.4091	88	59	76	11	1	53	5	1	0	0.598639	0.401361	0.0113636	0.863636	0.125	0.144737	0.898305	0.0847458	0.0169492
24	McDowell et al. 2007	Native vegetation	New Zealand	Basalt maturity sequence_Okaihau	A	-35.2489	173.842	232	Ultisols - Humults	scoria, scoriaceous rock or basalt lava flows (Kerikeri volcanic series, basaltic flow)	1900	14	1.67167	36	28	36	10	5.1	High	High	54.4	2.4	440	123.636	198	45	93	105	78	15	0	87	16	2	0	0.469697	0.530303	0.001	0.83871	0.16129	0.192308	0.828571	0.152381	0.0190476
25	McDowell et al. 2007	Native vegetation	New Zealand	Manawatu chronosequence_Beachsand	A	-40.3979	175.228	4	Entisols Psamments	coastal sand-dunes dominated by feldspars and quartz	850	12	0.832256	0.1	0.2	99.7	10	7.7	Moderate	Low	0.9	0.1	347	2.59366	39	11.2392	1	39	0	0	0	39	0	0	0	0.01	0.99					1	0.001	0.001
26	McDowell et al. 2007	Native vegetation	New Zealand	Manawatu chronosequence_Waitarere	A	-40.3711	175.259	14	Entisols Psamments	coastal sand-dunes dominated by feldspars and quartz	850	12	0.831282	0.3	0.6	99.1	3	6.4	Low	Low	12.5	1.1	468	26.7094	132	28.2051	51	81	45	4	2	72	7	2	0	0.386364	0.613636	0.0392157	0.882353	0.0784314	0.0888889	0.888889	0.0864198	0.0246914
27	McDowell et al. 2007	Native vegetation	New Zealand	Manawatu chronosequence_Motuiti	A	-40.4347	175.326	25	Entisols Psamments	coastal sand-dunes dominated by feldspars and quartz	850	12	0.831326	1.6	2.4	96	9	5.4	Low	Low	26.8	2.2	620	43.2258	267	43.0645	119	148	114	3	2	141	5	2	0	0.445693	0.554307	0.0168067	0.957983	0.0252101	0.0263158	0.952703	0.0337838	0.0135135
28	McDowell et al. 2007	Native vegetation	New Zealand	Manawatu chronosequence_Foxton	A	-40.4817	175.319	17	Inceptisols Dystrochrepts	coastal sand-dunes dominated by feldspars and quartz	850	12	0.832414	4	14	82	14	6	Low	Low	34.4	2.2	408	84.3137	304	74.5098	150	154	139	8	3	144	5	5	0	0.493421	0.506579	0.02	0.926667	0.0533333	0.057554	0.935065	0.0324675	0.0324675
29	McDowell et al. 2007	Native vegetation	New Zealand	Manawatu chronosequence_Koputaroa	A	-40.5684	175.338	16	Inceptisols Dystrochrepts	coastal sand-dunes dominated by feldspars and quartz	850	12	0.873816	20	10	70	10	4.9	Moderate	Intermediate	34.9	2.3	584	59.7603	436	74.6575	230	206	195	28	7	192	10	4	0	0.527523	0.472477	0.0304348	0.847826	0.121739	0.14359	0.932039	0.0485437	0.0194175
30	McDowell et al. 2007	Native vegetation	New Zealand	Reefton chronosequence_Hokitika	A	-42.0757	171.878	186	recent soil from alluvium (Entisol - Aquents -USDA)	alluvium dominated by granite and greywacke	2030	11	2.24717	10	25	65	18	4.2	Moderate	Low	29.1	1.5	1013	28.7266	324	31.9842	168	156	153	12	3	153	3	0	0	0.518519	0.481481	0.0178571	0.910714	0.0714286	0.0784314	0.980769	0.0192308	0.001
31	McDowell et al. 2007	Native vegetation	New Zealand	Reefton chronosequence_Ikamatuayoung	A	-42.0767	171.894	197	lowland yellow brown earth (Inceptisols - aquepts, USDA)	alluvium dominated by granite and greywacke	2030	11	2.2452	18	31	51	7	4.5	Moderate	Intermediate	69.8	2.8	719	97.0793	511	71.0709	264	247	223	32	9	231	9	7	0	0.516634	0.483366	0.0340909	0.844697	0.121212	0.143498	0.935223	0.0364372	0.0283401
32	McDowell et al. 2007	Native vegetation	New Zealand	Reefton chronosequence_Ikamatuaold	A	-42.0793	171.888	197	lowland yellow brown earth (Inceptisols - aquepts, USDA)	alluvium dominated by granite and greywacke	2030	11	2.24528	21	19	60	7	4.7	Moderate	Intermediate	99.4	5.2	719	138.248	517	71.9054	308	209	238	48	22	192	17	0	0	0.595745	0.404255	0.0714286	0.772727	0.155844	0.201681	0.91866	0.0813397	0.001
33	McDowell et al. 2007	Native vegetation	New Zealand	Reefton chronosequence_Ahaura	A	-42.0853	171.893	208	lowland yellow brown earth (Inceptisols - aquepts, USDA)	alluvium dominated by granite and greywacke	2030	11	2.24348	23.5	22.5	54	8	4.6	Moderate	Intermediate	138.7	6.3	694	199.856	407	58.6455	256	151	188	56	12	139	12	0	0	0.628993	0.371007	0.046875	0.734375	0.21875	0.297872	0.92053	0.0794702	0.001
34	McDowell et al. 2007	Native vegetation	New Zealand	Reefton chronosequence_Kumara	A	-42.099	171.855	228	gleyed podzol (Spodosols - aquods USDA)	alluvium dominated by granite and greywacke	2030	11	2.24029	15	37	48	15	4.4	Moderate	High	68.9	3.2	278	247.842	203	73.0216	105	98	89	13	3	98	0	0	0	0.517241	0.482759	0.0285714	0.847619	0.12381	0.146067	1	0.001	0.001
35	McDowell et al. 2007	Native vegetation	New Zealand	Reefton chronosequence_Okarito	A	-42.0737	171.904	317	strongly gleyed podzol (Spodosols - aquods USDA)	alluvium dominated by granite and greywacke	2030	11	2.22332	5	31	64	14	4.1	Moderate	High	72	2.9	179	402.235	131	73.1844	57	74	46	9	2	68	4	2	0	0.435115	0.564885	0.0350877	0.807018	0.157895	0.195652	0.918919	0.0540541	0.027027
36	Turner and Engelbrecht 2011	Native vegetation	Republic of Panama	Rio Paja (P26)	A	9.35821	-79.7481	256	Ultisols	Rhyolitic tuff	2141	27	1.20298	32	64	4	10	3.55	Moderate	High	28.1	2.1	74	379.73	44	59.4595	26	18	18	8	0	17	1	0	0	0.590909	0.409091	0.001	0.692308	0.307692	0.444444	0.944444	0.0555556	0.001
37	Turner and Engelbrecht 2011	Native vegetation	Republic of Panama	Rio Paja (P25)	A	9.07712	-79.7907	75	Ultisols	Rhyolitic tuff	2159	27	1.20383	31	56	13	10	3.59	Moderate	High	33.9	2.6	91	372.527	43	47.2527	22	21	16	6	0	20	1	0	0	0.511628	0.488372	0.001	0.727273	0.272727	0.375	0.952381	0.047619	0.001
38	Turner and Engelbrecht 2011	Native vegetation	Republic of Panama	Pipeline Road (P09)	A	9.16878	-79.7407	188	Oxisols	Basalt	2349	27	1.31042	72	15	13	10	4.86	High	High	52	4.4	175	297.143	85	48.5714	56	29	46	10	0	24	5	0	0	0.658824	0.341176	0.001	0.821429	0.178571	0.217391	0.827586	0.172414	0.001
39	Turner and Engelbrecht 2011	Native vegetation	Republic of Panama	Fort Sherman (P02)	A	9.17936	-79.8296	51	Ultisols	Sandstone	2873	27	1.61605	57	26	17	10	4.21	High	High	43	3.9	211	203.791	93	44.0758	48	45	41	7	0	42	3	0	0	0.516129	0.483871	0.001	0.854167	0.145833	0.170732	0.933333	0.0666667	0.001
40	Turner and Engelbrecht 2011	Native vegetation	Republic of Panama	Pipeline Road (P08)	A	9.1683	-79.7464	202	Oxisols	Basalt	2357	27	1.31378	48	29	23	10	4.71	High	High	40.1	3.5	278	144.245	134	48.2014	86	48	67	19	0	40	8	0	0	0.641791	0.358209	0.001	0.77907	0.22093	0.283582	0.833333	0.166667	0.001
41	Turner and Engelbrecht 2011	Native vegetation	Republic of Panama	Buena Vista (P12)	A	9.15181	-79.7158	113	Inceptisols	Conglomerate	2601	27	1.44729	52	33	15	10	4.22	Low	Intermediate	46.5	4	280	166.071	144	51.4286	80	64	66	14	0	58	6	0	0	0.555556	0.444444	0.001	0.825	0.175	0.212121	0.90625	0.09375	0.001
42	Turner and Engelbrecht 2011	Native vegetation	Republic of Panama	Santa Rita (P32)	A	9.35682	-79.7261	320	Oxisols	Basalt	3404	27	1.90532	52	33	15	10	5.06	Moderate	High	47.2	4.7	283	166.784	124	43.8163	66	58	57	9	0	51	7	0	0	0.532258	0.467742	0.001	0.863636	0.136364	0.157895	0.87931	0.12069	0.001
43	Turner and Engelbrecht 2011	Native vegetation	Republic of Panama	Pipeline Road (P15)	A	9.15994	-79.7451	66	Alfisols	Marine sediment	2336	27	1.30353	35	28	37	10	5.02	High	Intermediate	40	3.5	332	120.482	163	49.0964	86	77	78	8	0	68	9	0	0	0.527607	0.472393	0.001	0.906977	0.0930233	0.102564	0.883117	0.116883	0.001
44	Turner and Engelbrecht 2011	Native vegetation	Republic of Panama	Albrook	A	8.97753	-79.5642	71	Ultisols	Marine sediment	1860	27	1.02873	42	23	35	10	3.34	High	High	54.6	3.6	376	145.213	105	27.9255	52	53	40	12	0	49	4	0	0	0.495238	0.504762	0.001	0.769231	0.230769	0.3	0.924528	0.0754717	0.001
45	Turner and Engelbrecht 2011	Native vegetation	Republic of Panama	Pipeline Road (P17)	A	9.14787	-79.6931	154	Oxisols	Basalt	2269	27	1.25944	41	34	25	10	5.35	Moderate	High	39.3	3.6	471	83.4395	190	40.3397	109	81	98	11	0	74	7	0	0	0.573684	0.426316	0.001	0.899083	0.100917	0.112245	0.91358	0.0864198	0.001
46	Turner and Engelbrecht 2011	Native vegetation	Republic of Panama	Caritas	A	9.07582	-79.5483	142	Alfisols	Marine sediment	2027	27	1.12847	41	31	28	10	6.42	Low	Intermediate	56.6	4.5	505	112.079	238	47.1287	134	104	120	14	0	95	9	0	0	0.563025	0.436975	0.001	0.895522	0.104478	0.116667	0.913462	0.0865385	0.001
47	Turner and Engelbrecht 2011	Native vegetation	Republic of Panama	Cerro la Torre	A	8.9293	-79.5733	16	Inceptisols	Agglomerate	1730	27	0.95985	28	27	45	10	5.04	Moderate	Low	52.5	4	518	101.351	184	35.5212	94	90	82	12	0	78	12	0	0	0.51087	0.48913	0.001	0.87234	0.12766	0.146341	0.866667	0.133333	0.001
48	Turner and Engelbrecht 2011	Native vegetation	Republic of Panama	Las Cruces (P27)	A	9.07876	-79.6442	156	Inceptisols	Agglomerate	2033	27	1.13088	38	31	31	10	5.46	High	Low	36.6	3.1	532	68.797	216	40.6015	115	101	105	10	0	94	7	0	0	0.532407	0.467593	0.001	0.913043	0.0869565	0.0952381	0.930693	0.0693069	0.001
49	Turner and Engelbrecht 2011	Native vegetation	Republic of Panama	Buena Vista (P13)	A	9.14346	-79.8825	52	Inceptisols	Marine sediment	2591	27	1.45415	40	27	33	10	5.72	High	Low	48.6	4.7	574	84.669	260	45.2962	145	115	128	14	3	102	13	0	0	0.557692	0.442308	0.0206897	0.882759	0.0965517	0.109375	0.886957	0.113043	0.001
50	Turner and Engelbrecht 2011	Native vegetation	Republic of Panama	Fort Sherman (P01)	A	9.33253	-79.9541	47	Alfisols	Limestone	2875	27	1.59552	41	26	33	10	5.84	High	Intermediate	72.3	6.1	678	106.637	334	49.2625	206	128	189	17	0	117	11	0	0	0.616766	0.383234	0.001	0.917476	0.0825243	0.0899471	0.914062	0.0859375	0.001
51	Turner and Engelbrecht 2011	Native vegetation	Republic of Panama	Penã Blanca (P18)	A	9.1217	-79.6731	78	Alfisols	Marine sediment	2628	27	1.46526	59	31	10	10	5.48	High	Intermediate	66	6.8	688	95.9302	282	40.9884	166	116	143	20	3	107	9	0	0	0.588652	0.411348	0.0180723	0.861446	0.120482	0.13986	0.922414	0.0775862	0.001
52	Turner and Engelbrecht 2011	Native vegetation	Republic of Panama	Gamboa (P24)	A	8.98592	-79.6384	131	Alfisols	Agglomerate	2153	27	1.18657	49	33	18	10	5.43	High	Intermediate	73.4	6.3	794	92.4433	361	45.466	202	159	183	19	0	150	9	0	0	0.559557	0.440443	0.001	0.905941	0.0940594	0.103825	0.943396	0.0566038	0.001
53	Turner and Engelbrecht 2011	Native vegetation	Republic of Panama	Cerro Galera	A	8.92756	-79.5959	32	Inceptisols	Basalt	1790	27	0.992185	35	31	34	10	6.49	Low	Low	58.4	4.3	833	70.108	349	41.8968	195	154	181	14	0	143	11	0	0	0.558739	0.441261	0.001	0.928205	0.0717949	0.0773481	0.928571	0.0714286	0.001
54	Turner and Engelbrecht 2011	Native vegetation	Republic of Panama	Campo Chagres	A	9.22398	-79.5867	90	Alfisols	Calcareous sandstone	2481	27	1.40696	44	27	29	10	7	Low	Intermediate	104	8.9	1650	63.0303	824	49.9394	494	330	474	20	0	319	11	0	0	0.599515	0.400485	0.001	0.959514	0.0404858	0.0421941	0.966667	0.0333333	0.001
55	Turner et al. 2003c	Native vegetation	USA	y	A-E-B	42.6212	-114.131	1235	Aridisols	Basalt	275	8.7	0.208851	15	62	23	30	6.7	Low	Intermediate	13.42		890	15.0787	191	21.4607	42	149	42	0	0	147	2	0	0	0.219895	0.780105	0.001	1	0.001	0.001	0.986577	0.0134228	0.001
56	Turner et al. 2007	Native vegetation	New Zealand	Franz-Josephy chronosequence - Glacier Terminal	A	-43.4411	170.171	240	Entisol	Schist outwash	6520	10.8	7.97016	1	4	95	10	6.79	Low	Low	1.9	0.05	805	2.3	19	2.36025	5	14	5	0	0	13	1	0	0	0.263158	0.736842	0.001	1	0.001	0.001	0.928571	0.0714286	0.001
57	Turner et al. 2007	Native vegetation	New Zealand	Franz-Josephy chronosequence - Young Terrace	A	-43.4358	170.168	240	Entisol	Schist outwash	6576	10.8	8.03796	7	24	69	10	5.62	Low	Low	32.9	2.21	805	40.2	155	19.2547	97	58	82	14	1	47	11	0	0	0.625806	0.374194	0.0103093	0.845361	0.14433	0.170732	0.810345	0.189655	0.001
58	Turner et al. 2007	Native vegetation	New Zealand	Franz-Josephy chronosequence - Peter’s Pool	A	-43.4222	170.174	220	Entisol	Schist outwash	6188	10.8	7.57503	7	24	69	10	4.59	Moderate	Low	66.6	3.74	554	126	310	55.9567	222	88	184	29	9	75	13	0	0	0.716129	0.283871	0.0405405	0.828829	0.130631	0.157609	0.852273	0.147727	0.001
59	Turner et al. 2007	Native vegetation	New Zealand	Franz-Josephy chronosequence - Waiho Footbridge I	A	-43.4178	170.188	200	Inceptisol	Schist outwash	6300	10.8	7.72481	8	30	62	10	4.36	Moderate	Intermediate	106.9	6.08	514	208	388	75.4864	254	134	183	48	23	104	30	0	0	0.654639	0.345361	0.0905512	0.720472	0.188976	0.262295	0.776119	0.223881	0.001
60	Turner et al. 2007	Native vegetation	New Zealand	Franz-Josephy chronosequence - Waiho Footbridge II	A	-43.4256	170.186	200	Inceptisol	Schist outwash	6278	10.8	7.69877	17	55	28	10	3.95	Moderate	Intermediate	146	8.02	458	312	396	86.4629	259	137	176	58	25	105	32	0	0	0.65404	0.34596	0.0965251	0.679537	0.223938	0.329545	0.766423	0.233577	0.001
61	Turner et al. 2007	Native vegetation	New Zealand	Franz-Josephy chronosequence - Upper Wombat	A	-43.4133	170.176	245	Spodosol	Schist outwash	6427	10.8	7.84973	13	56	30	10	3.87	Moderate	High	93.9	4.99	327	287	278	85.0153	179	99	129	38	12	74	25	0	0	0.643885	0.356115	0.0670391	0.72067	0.212291	0.294574	0.747475	0.252525	0.001
62	Turner et al. 2007	Native vegetation	New Zealand	Franz-Josephy chronosequence - Mapourika	A	-43.3383	170.217	265	Spodosol	Schist outwash	3706	10.8	4.51341	7	56	36	10	3.94	Moderate	High	125.7	5.23	299	417	262	87.6254	174	88	120	40	14	61	27	0	0	0.664122	0.335878	0.0804598	0.689655	0.229885	0.333333	0.693182	0.306818	0.001
63	Turner et al. 2007	Native vegetation	New Zealand	Franz-Josephy chronosequence - Okarito Forest	A	-43.24	170.302	225	Spodosol	Schist outwash + loess accumulation	3623	10.8	4.34795	11	68	20	10	3.87	Moderate	High	86.2	3.37	201	431	180	89.5522	97	83	69	24	3	56	27	0	0	0.538889	0.461111	0.0309278	0.71134	0.247423	0.347826	0.674699	0.325301	0.001
64	Turner et al. 2007	Native vegetation	New Zealand	Franz-Josephy chronosequence - Deep Creek Ridge	A	-43.2572	170.199	145	Spodosol	Schist outwash + loess accumulation	3652	10.8	4.4125	10	77	13	10	3.93	Moderate	High	90.1	3.56	108	821	95	87.963	59	36	44	15	0	22	14	0	0	0.621053	0.378947	0.001	0.745763	0.254237	0.340909	0.611111	0.388889	0.001
65	Turner et al. 2014	Native vegetation	New Zealand	Haast chronosequence - dune 1	A	-43.8185	169.069	3	Entisol	well-foliated schist masses, including semi-schistose graywacke and argillite	1958.5	11.3	2.2378	1.39382	0.05	98.55	20	4.7	Moderate	Low	9.1	0.7	311	29.2605	72	23.1511	41.76	30.312	36.936	4.824	0	27.72	2.592	0	0	0.58	0.421	0.001	0.884483	0.115517	0.130604	0.914489	0.0855107	0.001
66	Turner et al. 2014	Native vegetation	New Zealand	Haast chronosequence - dune 2	A	-43.8195	169.07	2	Entisol	well-foliated schist masses, including semi-schistose graywacke and argillite	1958.5	11.3	2.23802	3.19375	6.1446	90.6616	12	4.2	Moderate	Low	29.9	1.7	194	154.124	178	91.7526	129.762	48.238	118.192	9.79	1.78	40.406	7.832	0	0	0.729	0.271	0.0137174	0.910837	0.0754458	0.0828313	0.837638	0.162362	0.001
67	Turner et al. 2014	Native vegetation	New Zealand	Haast chronosequence - dune 3	A	-43.8193	169.076	3.5	Entisol	well-foliated schist masses, including semi-schistose graywacke and argillite	1958.5	11.3	2.23774	4.78508	10.2204	84.9945	8	4.2	Moderate	Low	31.3	1.6	229	136.681	196	85.5895	138.964	57.036	120.148	14.112	4.704	48.804	8.232	0	0	0.709	0.291	0.0338505	0.864598	0.101551	0.117455	0.85567	0.14433	0.001
68	Turner et al. 2014	Native vegetation	New Zealand	Haast chronosequence - dune 4	A	-43.8202	169.077	4	Entisol	well-foliated schist masses, including semi-schistose graywacke and argillite	1958.5	11.3	2.23768	3.30752	7.45018	89.2423	8	4.1	Moderate	Low	31.7	1.7	211	150.237	178	84.3602	122.642	55.358	107.156	11.926	3.56	44.5	10.858	0	0	0.689	0.311	0.0290276	0.87373	0.0972424	0.111296	0.803859	0.196141	0.001
69	Turner et al. 2014	Native vegetation	New Zealand	Haast chronosequence - dune 6	A	-43.8211	169.078	17	Entisol	well-foliated schist masses, including semi-schistose graywacke and argillite	1958.5	11.3	2.23534	3.24698	6.53208	90.2209	15	4.1	Moderate	Low	32.8	1.9	248	132.258	210	84.6774	144.48	65.52	129.36	11.13	3.99	54.6	10.92	0	0	0.688	0.312	0.0276163	0.895349	0.0770349	0.086039	0.833333	0.166667	0.001
70	Turner et al. 2014	Native vegetation	New Zealand	Haast chronosequence - dune 8	A	-43.8218	169.081	5	Entisol	well-foliated schist masses, including semi-schistose graywacke and argillite	1958.5	11.3	2.23755	5.00546	16.7487	78.2458	26	3.9	Moderate	Low	18.7	0.9	155	120.645	126	81.2903	99.792	26.208	87.192	8.568	4.032	25.074	1.134	0	0	0.792	0.208	0.040404	0.873737	0.0858586	0.0982659	0.956731	0.0432692	0.001
71	Turner et al. 2014	Native vegetation	New Zealand	Haast chronosequence - dune 11	A	-43.8227	169.081	12	Entisol	well-foliated schist masses, including semi-schistose graywacke and argillite	1958.5	11.3	2.23631	6.37186	11.17	82.4581	16	3.9	Moderate	Low	20.4	0.9	142	143.662	115	80.9859	90.965	24.035	82.8	6.67	1.495	21.275	2.76	0	0	0.791	0.209	0.0164349	0.91024	0.0733249	0.0805556	0.885167	0.114833	0.001
72	Turner et al. 2014	Native vegetation	New Zealand	Haast chronosequence - dune 12	A	-43.8233	169.083	8	Spodosol	well-foliated schist masses, including semi-schistose graywacke and argillite	1958.5	11.3	2.23706	7.19403	9.66098	83.145	28	3.8	Moderate	Intermediate	20.9	0.9	105	199.048	85	80.9524	68.425	16.49	63.835	4.59	0	14.875	1.615	0	0	0.805	0.194	0.001	0.932919	0.0670807	0.0719041	0.902062	0.0979381	0.001
73	Turner et al. 2014	Native vegetation	New Zealand	Haast chronosequence - dune 13	A	-43.8246	169.085	4	Spodosol	well-foliated schist masses, including semi-schistose graywacke and argillite	1958.5	11.3	2.23784	7.11542	9.69342	83.1912	42	3.7	Moderate	Intermediate	25.2	1.1	111	227.027	97	87.3874	76.339	20.661	68.87	7.469	0	18.333	2.328	0	0	0.787	0.213	0.001	0.90216	0.0978399	0.108451	0.887324	0.112676	0.001
74	Turner et al. 2014	Native vegetation	New Zealand	Haast chronosequence - dune 17	A	-43.8273	169.083	15	Spodosol	well-foliated schist masses, including semi-schistose graywacke and argillite	1958.5	11.3	2.23592	6.09328	14.943	78.9637	28	3.6	Moderate	High	23.3	1	102	228.431	82	80.3922	64.042	17.958	57.154	6.888	0	16.072	1.886	0	0	0.781	0.219	0.001	0.892446	0.107554	0.120516	0.894977	0.105023	0.001
75	Turner et al. 2014	Native vegetation	New Zealand	Haast chronosequence - dune 1	O	-43.8185	169.069	3	Entisol	well-foliated schist masses, including semi-schistose graywacke and argillite	1958.5	11.3	2.2378				1	5.6			229.3	11	885	259.096	559	63.1638	348.257	210.743	296.27	51.987	0	158.197	52.546	0	0	0.623	0.377	0.001	0.850722	0.149278	0.175472	0.750663	0.249337	0.001
76	Turner et al. 2014	Native vegetation	New Zealand	Haast chronosequence - dune 2	O	-43.8195	169.07	2	Entisol	well-foliated schist masses, including semi-schistose graywacke and argillite	1958.5	11.3	2.23802				5	4.1			375.7	9.6	691	543.705	581	84.081	309.673	270.746	244.02	65.653	0	160.937	109.809	0	0	0.533	0.466	0.001	0.787992	0.212008	0.269048	0.594421	0.405579	0.001
77	Turner et al. 2014	Native vegetation	New Zealand	Haast chronosequence - dune 3	O	-43.8193	169.076	3.5	Entisol	well-foliated schist masses, including semi-schistose graywacke and argillite	1958.5	11.3	2.23774				6	5			324.6	10.3	706	459.773	663	93.9093	366.639	296.361	279.123	87.516	0	192.27	104.091	0	0	0.553	0.447	0.001	0.761302	0.238698	0.313539	0.64877	0.35123	0.001
78	Turner et al. 2014	Native vegetation	New Zealand	Haast chronosequence - dune 4	O	-43.8202	169.077	4	Entisol	well-foliated schist masses, including semi-schistose graywacke and argillite	1958.5	11.3	2.23768				3	4.7			360.5	9.9	654	551.223	595	90.9786	324.275	271.32	240.38	83.895	0	166.005	79.135	26.18	0	0.545	0.456	0.001	0.741284	0.258716	0.34901	0.611842	0.291667	0.0964912
79	Turner et al. 2014	Native vegetation	New Zealand	Haast chronosequence - dune 6	O	-43.8211	169.078	17	Entisol	well-foliated schist masses, including semi-schistose graywacke and argillite	1958.5	11.3	2.23534				4	5.6			254.2	8.2	646	393.498	538	83.2817	285.14	253.398	230.802	54.338	0	213.586	39.812	0	0	0.53	0.471	0.001	0.809434	0.190566	0.235431	0.842887	0.157113	0.001
80	Turner et al. 2014	Native vegetation	New Zealand	Haast chronosequence - dune 8	O	-43.8218	169.081	5	Entisol	well-foliated schist masses, including semi-schistose graywacke and argillite	1958.5	11.3	2.23756				21	3.7			500.1	16	622	804.019	408	65.5949	223.584	184.008	119.136	104.448	0	69.768	13.872	100.368	0	0.548	0.451	0.001	0.532847	0.467153	0.876712	0.379157	0.075388	0.545455
81	Turner et al. 2014	Native vegetation	New Zealand	Haast chronosequence - dune 11	O	-43.8227	169.081	12	Entisol	well-foliated schist masses, including semi-schistose graywacke and argillite	1958.5	11.3	2.23631				25	3.9			477.7	15.2	599	797.496	498	83.1386	288.84	209.16	171.312	117.528	0	101.592	13.446	94.122	0	0.58	0.42	0.001	0.593103	0.406897	0.686047	0.485714	0.0642857	0.45
82	Turner et al. 2014	Native vegetation	New Zealand	Haast chronosequence - dune 12	O	-43.8233	169.083	8	Spodosol	well-foliated schist masses, including semi-schistose graywacke and argillite	1958.5	11.3	2.23706				22	3.8			488.1	14.4	485	1006.39	312	64.3299	172.224	139.776	91.416	80.808	0	57.72	2.808	79.248	0	0.552	0.448	0.001	0.530797	0.469203	0.883959	0.412946	0.0200893	0.566964
83	Turner et al. 2014	Native vegetation	New Zealand	Haast chronosequence - dune 13	O	-43.8246	169.085	4	Spodosol	well-foliated schist masses, including semi-schistose graywacke and argillite	1958.5	11.3	2.23784				28	4.1			461.3	13.8	492	937.602	339	68.9024	202.722	136.617	117.294	85.428	0	75.597	10.17	50.85	0	0.598	0.403	0.001	0.578595	0.421405	0.728324	0.55335	0.0744417	0.372208
84	Turner et al. 2014	Native vegetation	New Zealand	Haast chronosequence - dune 17	O	-43.8273	169.083	15	Spodosol	well-foliated schist masses, including semi-schistose graywacke and argillite	1958.5	11.3	2.23593				17	3.8			508.8	14.4	611	832.733	433	70.8674	258.934	174.066	153.715	105.219	0	63.651	11.691	98.724	0	0.598	0.402	0.001	0.593645	0.406355	0.684507	0.365672	0.0671642	0.567164
85	Turner 2008	Native vegetation	Republic of Panama	z	A	8.98715	-79.5784	20	Ultisols	Marine sediment	1800	27	0.998612	28	52	20	10	4.33	Moderate	High	26.8	2.27	358	74.8603	130.2	36.3687	71.1	59.1	54.5	16.6	0	56	3.1	0	0	0.546083	0.453917	0.001	0.766526	0.233474	0.304587	0.947547	0.0524535	0.001
86	Vicent et al. 2010	Native vegetation	Republic of Panama	Semi-deciduous lowland forest Gigante Peninsula Barro Colorado	A	9.1	-79.9	60	Oxisols	Basalt	2620	26	1.46954	33	20	47	2	5.1	High	High	82	7.1	339	241.888	179	52.8024	120.192	58.6538	88.4615	31.7308	0	50	8.65385	0	0	0.671465	0.327675	0.001	0.736	0.264	0.358696	0.852459	0.147541	0.001
87	Vicent et al. 2013	Native vegetation	Sweden	Västerbotten chronosequence Baggöberget 1	O	63.7953	20.4925	2	Entisol	glacial till deposits - All soil samples (from the E and C horizons of all sites) contained mainly quartz and about 20%–30% feldspars.	660	2.7	1.29089				10	5.5			344		639	538	413	64.6322	296	117	207	89	0	46	28	43	0	0.716707	0.283293	0.001	0.699324	0.300676	0.429952	0.393162	0.239316	0.367521
88	Vicent et al. 2013	Native vegetation	Sweden	Västerbotten chronosequence Baggöberget 2	O	63.7953	20.4925	5	Entisol	glacial till deposits - All soil samples (from the E and C horizons of all sites) contained mainly quartz and about 20%–30% feldspars.	660	2.7	1.29055				10	4			455	16.7	570	797	395	69.2982	259	136	136	123	0	26	2	108	0	0.655696	0.344304	0.001	0.525097	0.474903	0.904412	0.191176	0.0147059	0.794118
89	Vicent et al. 2013	Native vegetation	Sweden	Västerbotten chronosequence Baggöberget 3	O	63.7964	20.4811	11	Spodosol	glacial till deposits - All soil samples (from the E and C horizons of all sites) contained mainly quartz and about 20%–30% feldspars.	660	2.7	1.2899				10	3.9			461	11.8	732	630	486	66.3934	286	200	132	142	12	54	7	139	0	0.588477	0.411523	0.041958	0.461538	0.496503	1.07576	0.27	0.035	0.695
90	Vicent et al. 2013	Native vegetation	Sweden	Västerbotten chronosequence Oxtjärnsdiket	O	63.6681	19.9642	25	Spodosol	glacial till deposits - All soil samples (from the E and C horizons of all sites) contained mainly quartz and about 20%–30% feldspars.	660	2.7	1.28854				10	3.9			456	13.1	937	486	819	87.4066	607	212	401	181	25	42	14	156	0	0.741148	0.258852	0.0411862	0.660626	0.298188	0.451372	0.198113	0.0660377	0.735849
91	Vicent et al. 2013	Native vegetation	Sweden	Västerbotten chronosequence Bäcksjön Sör	O	63.9019	20.34	45	Spodosol	glacial till deposits - All soil samples (from the E and C horizons of all sites) contained mainly quartz and about 20%–30% feldspars.	660	2.7	1.29788				10	4			405	10.6	650	622	423	65.0769	268	155	146	109	13	42	17	96	0	0.63357	0.36643	0.0485075	0.544776	0.406716	0.746575	0.270968	0.109677	0.619355
92	Vicent et al. 2013	Native vegetation	Sweden	Västerbotten chronosequence Lappberget	O	63.9969	20.6067	68	Spodosol	glacial till deposits - All soil samples (from the E and C horizons of all sites) contained mainly quartz and about 20%–30% feldspars.	660	2.7	1.2987				10	3.9			395	11.3	790	500	554	70.1266	409	145	269	123	17	39	17	89	0	0.738267	0.261733	0.0415648	0.657702	0.300733	0.457249	0.268966	0.117241	0.613793
93	Vicent et al. 2013	Native vegetation	Sweden	Västerbotten chronosequence Sör Grundbäck	O	64.0547	20.3364	96	Spodosol	glacial till deposits - All soil samples (from the E and C horizons of all sites) contained mainly quartz and about 20%–30% feldspars.	660	2.7	1.30921				10	4			402	9.2	654	614	371	56.7278	235	136	132	93	10	36	15	85	0	0.633423	0.366577	0.0425532	0.561702	0.395745	0.704545	0.264706	0.110294	0.625
94	Vicent et al. 2013	Native vegetation	Sweden	Västerbotten chronosequence Åckerbäck	O	64.0761	20.3078	123	Spodosol	glacial till deposits - All soil samples (from the E and C horizons of all sites) contained mainly quartz and about 20%–30% feldspars.	660	2.7	1.31432				10	3.9			454	10.7	664	684	422	63.5542	239	183	116	111	12	47	6	130	0	0.566351	0.433649	0.0502092	0.485356	0.464435	0.956897	0.256831	0.0327869	0.710383
95	Doolette et al. 2016	Native vegetation	Australia	Snowy Mountains region of south-eastern Australia A1053	A	-36.5833	148.95	1859	Histosol	gneissic granite	2033	-0.4	1.59291	25	18	57	10	4.9	Moderate	Low	56	4.2	665	84.2105	408	61.3534	264	144	243	19	2	134	4	6	0	0.647059	0.352941	0.507576	0.920455	0.0719697	0.0781893	0.930556	0.0277778	0.0416667
96	Doolette et al. 2016	Native vegetation	Australia	Snowy Mountains region of south-eastern Australia A1054	A	-36.75	148.5	2159	Histosol	gneissic granite	2159	-0.4	1.61133	30	30	40	10	4.7	High	Low	120	9.8	1190	100.84	542	45.5462	360	182	297	40	23	179	3	0	0	0.664207	0.335793	0.497222	0.825	0.111111	0.13468	0.983516	0.0164835	0.001
97	Doolette et al. 2016	Native vegetation	Australia	Snowy Mountains region of south-eastern Australia A1055	A	-36.5833	148.867	1245	Histosol	gneissic granite	1245	1.2	1.0221	30	30	40	10	5.7	High	Intermediate	72	3.5	624	115.385	291	46.6346	156	135	131	25	0	130	5	0	0	0.536082	0.463918	0.833333	0.839744	0.160256	0.19084	0.962963	0.037037	0.001
98	Doolette et al. 2016	Native vegetation	Australia	Snowy Mountains region of south-eastern Australia A1056	A	-36.5833	149.183	889	Spodosol	gneissic granite	889	1.2	0.758968	25	18	57	10	6.2	Low	Intermediate	42	1	270	155.556	158	58.5185	47	111	47	0	0	105	6	0	0	0.297468	0.702532	2.23404	1	0.001	0.001	0.945946	0.0540541	0.001
99	Doolette et al. 2016	Native vegetation	Australia	Snowy Mountains region of south-eastern Australia A1057	A	-36.5833	148.933	889	Spodosol	gneissic granite	889	4	0.750274	8	10	82	10	5.7	Low	Intermediate	24	1.1	195	123.077	142	72.8205	93	50	88	5	0	46	4	0	0	0.65493	0.352113	0.494624	0.946237	0.0537634	0.0568182	0.92	0.08	0.001
100	Li et al. 2016	Native vegetation	Italy	Royal Palace of Portici (NA)	A	40.8125	14.3465	82	Alfisols	quaternary deposits and vulcanics	1007	15.5	0.817789	12	55	33	20	7.47	Moderate	Intermediate	10.2	0.36	720	14.1667	188	26.1111	59.1	129.8	52.7	1.2	5.2	127.8	0	2	0	0.314362	0.690426	2.16244	0.891709	0.0203046	0.0227704	0.984592	0.001	0.0154083
